# Supplementary material
Source: PubMed Central journal article supplement (PMC2581979)
Supplement: blood-2007-10-119123_1.pdf [file blood-2007-10-119123_1.pdf]

| <b>Probe sets</b> | <b>Gene symbols</b> | <b>Fold Change</b> | <b>q-value(%)</b> |
|-------------------|---------------------|--------------------|-------------------|
| 201746_at         | TP53                | 5.501              | 0                 |
| 219073_s_at       | OSBPL10             | 2.036              | 0                 |
| 232946_s_at       | NADSYN1             | 1.417              | 0                 |
| 204446_s_at       | ALOX5               | 1.997              | 0                 |
| 227964_at         | FKSG44              | 1.406              | 0                 |
| 203659_s_at       | TRIM13              | 1.365              | 0                 |
| 208029_s_at       | LAPTM4B             | 3.703              | 0                 |
| 218084_x_at       | FXVD5               | 1.410              | 0                 |
| 204882_at         | ARHGAP25            | 1.774              | 0                 |
| 225804_at         | CYB5D2              | 1.389              | 0                 |
| 213293_s_at       | TRIM22              | 2.517              | 0                 |
| 209295_at         | TNFRSF10B           | 1.623              | 0                 |
| 226225_at         | MCC                 | 1.464              | 0                 |
| 224700_at         | STT3B               | 1.239              | 0                 |
| 212285_s_at       | AGRN                | 1.667              | 0                 |
| 226158_at         | KLHL24              | 1.296              | 0                 |
| 34408_at          | RTN2                | 1.819              | 0                 |
| 225272_at         | SAT2                | 1.374              | 0                 |
| 218918_at         | MAN1C1              | 2.266              | 0                 |
| 219734_at         | SIDT1               | 1.571              | 0                 |
| 205968_at         | KCNS3               | 2.722              | 0                 |
| 34206_at          | CENTD2              | 1.255              | 0                 |
| 210130_s_at       | TM7SF2              | 1.355              | 0                 |
| 218902_at         | NOTCH1              | 1.309              | 0                 |
| 207996_s_at       | C18orf1             | 1.551              | 0                 |
| 218346_s_at       | SESN1               | 1.400              | 0                 |
| 221767_x_at       | HDLBP               | 1.317              | 0                 |
| 207738_s_at       | NCKAP1              | 1.618              | 0                 |
| 242463_x_at       | ZNF600              | 1.317              | 0                 |
| 219628_at         | ZMAT3               | 1.252              | 0.141             |
| 214953_s_at       | APP                 | 1.633              | 0.141             |
| 203596_s_at       | IFIT5               | 1.224              | 0.141             |
| 202812_at         | GAA                 | 1.305              | 0.141             |
| 212134_at         | PHLDB1              | 1.371              | 0.399             |
| 218769_s_at       | ANKRA2              | 1.141              | 0.399             |
| 209328_x_at       | HIGD2A              | 1.350              | 0.399             |
| 201236_s_at       | BTG2                | 1.112              | 0.399             |
| 227099_s_at       | LOC387763           | 1.695              | 0.465             |
| 217749_at         | COPG                | 1.128              | 0.465             |
| 220998_s_at       | UNC93B1             | 1.247              | 0.465             |
| 224022_x_at       | WNT16               | 1.954              | 0.681             |
| 223199_at         | MKNK2               | 1.127              | 0.775             |
| 220511_s_at       | DLC1                | 1.270              | 0.865             |
| 218552_at         | ECHDC2              | 1.156              | 0.865             |
| 214657_s_at       | TncRNA              | 1.228              | 0.865             |
| 225289_at         | STAT3               | 1.115              | 0.865             |
| 238647_at         | C14orf28            | 1.189              | 0.865             |
| 218562_s_at       | TMEM57              | 1.022              | 0.865             |

| <b>Probe sets</b> | <b>Gene symbols</b> | <b>Fold Change</b> | <b>q-value(%)</b> |
|-------------------|---------------------|--------------------|-------------------|
| 214209_s_at       | ABCB9               | 1.042              | 0.865             |
| 203186_s_at       | S100A4              | 0.344              | 0.906             |
| 203799_at         | CD302               | 0.641              | 0.906             |
| 211379_x_at       | B3GALNT1            | 0.169              | 0.906             |
| 222958_s_at       | DEPDC1              | 0.582              | 0.906             |
| 204069_at         | MEIS1               | 0.644              | 0.906             |
| 226416_at         | THEX1               | 0.788              | 0.906             |
| 224392_s_at       | OPN3                | 0.686              | 0.906             |
| 211814_s_at       | CCNE2               | 0.736              | 0.906             |
| 228557_at         | L3MBTL4             | 0.705              | 0.906             |
| 241733_at         | C18orf54            | 0.548              | 0.906             |
| 207791_s_at       | RAB1A               | 0.846              | 0.906             |
| 1557129_a_at      | FAM111B             | 0.475              | 0.906             |
| 211519_s_at       | KIF2C               | 0.752              | 0.906             |
| 236224_at         | RIT1                | 0.748              | 0.906             |
| 223785_at         | FANCI               | 0.778              | 0.906             |
| 241820_at         | RIF1                | 0.801              | 0.906             |
| 235425_at         | SGOL2               | 0.743              | 0.906             |
| 234306_s_at       | SLAMF7              | 0.807              | 0.906             |
| 212855_at         | DCUN1D4             | 0.742              | 0.906             |
| 210864_x_at       | HFE                 | 0.806              | 0.906             |
| 224428_s_at       | CDCA7               | 0.561              | 0.906             |
| 1552619_a_at      | ANLN                | 0.731              | 0.906             |
| 218542_at         | CEP55               | 0.696              | 0.906             |
| 229886_at         | C5orf34             | 0.724              | 0.906             |
| 209118_s_at       | TUBA1A              | 0.606              | 0.906             |
| 1555772_a_at      | CDC25A              | 0.671              | 0.906             |
| 244439_at         | SPRED1              | 0.594              | 0.906             |
| 204531_s_at       | BRCA1               | 0.696              | 0.906             |
| 202990_at         | PYGL                | 0.785              | 0.906             |
| 209884_s_at       | SLC4A7              | 0.704              | 0.906             |
| 1570173_at        | INTS7               | 0.687              | 0.906             |
| 226661_at         | CDCA2               | 0.754              | 0.906             |
| 232238_at         | ASPM                | 0.668              | 0.906             |
| 219502_at         | NEIL3               | 0.789              | 0.906             |
| 204161_s_at       | ENPP4               | 0.810              | 1.014             |
| 242519_at         | SEPP1               | 0.695              | 1.119             |
| 219262_at         | SUV39H2             | 0.752              | 1.22              |
